# Supplementary material for: Influence of the dental topical application of a nisin-biogel in the oral microbiome of dogs: a pilot study
Source: PeerJ. 2021 Jul 14;9:e11626. doi: 10.7717/peerj.11626 (PMC8286056; doi:10.7717/peerj.11626)
Supplement: Supplemental Information 2 — Description of the number of reads obtained by sample and taxonomic level. Filum and Species were the taxonomic levels evaluated. [file peerj-09-11626-s002.xlsx]

## Sheet: Filo
id	Actinobacteria	Bacteroidetes	Chlorobi	Chloroflexi	Elusimicrobia	Firmicutes	Fusobacteria	GN02	OD1	OP11	Proteobacteria	SR1	Spirochaetes	Synergistetes	TM7	Tenericutes	WS6	ZB3
#q2:types	numeric	numeric	numeric	numeric	numeric	numeric	numeric	numeric	numeric	numeric	numeric	numeric	numeric	numeric	numeric	numeric	numeric	numeric
Charlie1a	1462	36051	34	54	0	6689	7360	1178	0	0	30007	5801	9654	133	2219	4229	361	0
Charlie1b	2212	42592	183	105	0	9742	8786	197	0	0	19938	5639	13626	379	3278	11437	688	0
Charlie2a	3831	33941	175	76	0	6773	7415	514	0	0	26563	2691	7788	397	1920	4012	162	0
Charlie2b	3215	53732	206	46	0	11303	12455	1154	0	0	47845	4926	5459	180	2445	5800	153	0
Charlie3a	2956	50862	72	53	0	16898	12704	350	0	0	30604	6397	8960	313	4353	6533	193	0
Charlie3b	2469	39563	126	64	0	15234	10122	202	0	0	24970	5333	8459	275	3666	8600	231	0
Vasco1a	1724	65476	17	61	190	11883	9633	7071	139	212	32256	8516	5363	146	2010	331	44	0
Vasco1b	1930	48876	17	42	224	5119	10851	1965	120	635	23140	3061	4417	131	1165	183	38	14
Vasco2a	2653	50336	7	38	101	3755	3336	2753	25	364	33269	1871	3218	153	682	405	137	0
Vasco2b	2333	55014	6	14	164	3973	1651	1863	122	558	38055	1460	2801	254	605	143	23	2
Vasco3a	6105	51030	328	41	144	19743	13741	1338	23	910	35632	2931	7102	689	2924	602	119	5
Vasco3b	3708	49146	24	72	172	17134	10085	2434	65	251	36201	3481	7759	496	3699	742	163	6
T1	7328	192995	251	262	414	33433	36630	10411	259	847	105341	23017	33060	789	8672	16180	1131	14
T2	12032	193023	394	174	265	25804	24857	6284	147	922	145732	10948	19266	984	5652	10360	475	2
T3	15238	190601	550	230	316	69009	46652	4324	88	1161	127407	18142	32280	1773	14642	16477	706	11
%T1	1.55573	40.9726	0.053287	0.0556223	0.0878917	7.09779	7.77651	2.21024	0.0549854	0.179817	22.3638	4.88648	7.0186	0.167504	1.84106	3.435	0.24011	0.00297218
%T2	2.63097	42.2073	0.0861539	0.0380477	0.0579462	5.64243	5.43535	1.37409	0.0321437	0.201609	31.8665	2.39394	4.2128	0.215166	1.23589	2.26537	0.103866	0.00043733
%T3	2.82391	35.3222	0.101926	0.0426236	0.0585611	12.7888	8.64555	0.801324	0.0163082	0.215157	23.6111	3.36208	5.98213	0.328572	2.71346	3.05352	0.130836	0.00203852

## Sheet: species
id	Actinomyces hyovaginalis	Propionibacterium acnes	Coriobacteriaceae Atopobium	Porphyromonas endodontalis	Prevotella intermedia	Capnocytophaga canimorsus	Bergeyella zoohelcum	Streptococcus minor	Clostridium perfringens	Clostridium hathewayi	Peptostreptococcus anaerobius	Anaerorhabdus furcosa	Brachymonas chironomi	Neisseria animaloris	Neisseria shayeganii	Neisseria weaveri	Neisseria zoodegmatis	Desulfomicrobium orale	Arcobacter cryaerophilus	Campylobacter fetus	Campylobacter rectus	Wolinella succinogenes	Plesiomonas shigelloides	Haemophilus haemoglobinophilus	Moraxella ovis	Psychrobacter pulmonis
#q2:types	numeric	numeric	numeric	numeric	numeric	numeric	numeric	numeric	numeric	numeric	numeric	numeric	numeric	numeric	numeric	numeric	numeric	numeric	numeric	numeric	numeric	numeric	numeric	numeric	numeric	numeric
Charlie1a	2	5	0	1320	90	1418	4959	0	0	20	95	18	5	26	54	147	103	484	4495	0	3765	515	0	23	0	10
Charlie1b	0	0	0	1784	2	1277	810	0	13	57	37	61	102	99	34	137	40	1343	1445	0	5732	243	0	45	0	0
Charlie2a	4	7	0	1802	34	2762	2120	0	0	0	17	20	99	82	57	346	18	1504	725	0	6148	364	9	50	0	0
Charlie2b	0	20	0	9550	0	3703	12799	15	6	0	2	38	71	128	57	229	116	244	5498	0	6758	353	22	106	0	0
Charlie3a	0	5	0	3114	0	2522	3296	7	13	0	22	50	41	46	117	152	50	419	1645	0	7602	222	2	12	0	0
Charlie3b	0	4	0	1791	55	1959	1492	2	0	0	12	251	122	18	104	143	50	184	2649	0	6863	209	0	47	0	0
Vasco1a	4	2	3	3413	43	5621	6519	85	0	0	26	0	42	130	409	272	0	314	2131	29	4402	29	0	559	0	0
Vasco1b	17	0	0	2987	18	2491	2876	12	0	0	29	0	40	173	507	102	6	109	1022	0	2182	16	0	43	0	0
Vasco2a	69	4	0	908	139	4241	8603	25	9	0	11	0	0	633	517	1146	66	716	495	0	3349	29	0	87	0	0
Vasco2b	12	15	0	963	102	3012	7672	30	0	0	4	0	0	523	966	13	0	668	1455	0	3211	25	0	32	0	0
Vasco3a	0	8	7	1868	63	4654	1136	9	0	0	0	0	0	2035	882	0	208	718	221	0	5448	66	0	289	245	0
Vasco3b	7	63	0	1382	208	2509	825	12	0	0	0	2	0	318	605	275	57	1385	1551	0	6127	62	0	110	0	0
T1	23	7	3	9504	153	10807	15164	97	13	77	187	79	189	428	1004	658	149	2250	9093	29	16081	803	0	670	0	10
T2	85	46	0	13223	275	13718	31194	70	15	0	34	58	170	1366	1597	1734	200	3132	8173	0	19466	771	31	275	0	0
T3	7	80	7	8155	326	11644	6749	30	13	0	34	303	163	2417	1708	570	365	2706	6066	0	26040	559	2	458	245	0
total	115	133	10	30882	754	36169	53107	197	41	77	255	440	522	4211	4309	2962	714	8088	23332	29	61587	2133	33	1403	245	10
%T1	0.0340852	0.0103738	0.00444589	14.0846	0.226741	16.0156	22.4725	0.143751	0.0192655	0.114111	0.277127	0.117075	0.280091	0.634281	1.48789	0.975133	0.220813	3.33442	13.4755	0.042977	23.8315	1.19002	0	0.992916	0	0.0148196
%t2	0.0888815	0.0481006	0	13.8268	0.287558	14.3444	32.6184	0.0731965	0.015685	0	0.0355526	0.0606485	0.177763	1.42838	1.66993	1.81318	0.209133	3.27502	8.54621	0	20.3549	0.806207	0.0324156	0.287558	0	0
%t3	0.0101971	0.116538	0.0101971	11.8796	0.474893	16.9621	9.83146	0.0437018	0.0189375	0	0.0495287	0.441389	0.237447	3.52091	2.48809	0.830335	0.531706	3.94191	8.83651	0	37.9332	0.814311	0.00291346	0.667181	0.356898	0
